# Supplementary material
Source: MDPI journal article supplement (https://www.mdpi.com/2227-7099/12/4/78)
Supplement: s1 [file s1]

Archive with 2 entries (2 files):
- QUESTIONNAIRE A.pdf
- QUESTIONNAIRE B.pdf
