# Supplementary material
Source: MDPI journal article supplement (https://www.mdpi.com/2227-7099/12/4/78)
Supplement: s1 [file s1]

## QUESTIONNAIRE A

### Part A. Demographic Characteristics

#### 1. Age

|         |  |
|---------|--|
| 31-40   |  |
| 41-50   |  |
| Over 51 |  |

#### 2. Education

|                     |  |
|---------------------|--|
| Secondary Education |  |
| University Degree   |  |
| Master Degree       |  |
| Ph D                |  |

#### 3. Responsibility position

|                 |  |
|-----------------|--|
| Employee        |  |
| Department Head |  |
| Manager         |  |
| Appointee       |  |
| Other           |  |

#### 4. Years of experience in this position

|       |  |
|-------|--|
| 1-5   |  |
| 6-10  |  |
| 11-15 |  |
| 16-20 |  |

|         |  |
|---------|--|
| Over 21 |  |
|---------|--|

5. No of employees in the Revenues Department

|             |  |
|-------------|--|
| 1           |  |
| 2-3         |  |
| 4-5         |  |
| more than 6 |  |

**Part B. Participants' views regarding Local Authorities' Revenues**

6. Please answer the following questions on the following scale: 1=Not at all, 2=Low scale, 3=Medium scale, 4=High scale, 5=Very much.

|                                                                                                          | 1 | 2 | 3 | 4 | 5 |
|----------------------------------------------------------------------------------------------------------|---|---|---|---|---|
| <b>Organization of the Revenues Department</b>                                                           |   |   |   |   |   |
| To what extent is the separation of duties of staff in the Revenues Department clear?                    |   |   |   |   |   |
| To what extent is there a documented job description for the employees of the Revenues Department?       |   |   |   |   |   |
| To what extent is there an inventory of the municipality's property?                                     |   |   |   |   |   |
| To what extent is there proper maintenance of the register of debtors?                                   |   |   |   |   |   |
| <b>Human Resources</b>                                                                                   |   |   |   |   |   |
| To what extent do employees in the Revenues Department participate in seminars regarding the subject?    |   |   |   |   |   |
| To what extent is the number of employees in the Revenues Department sufficient?                         |   |   |   |   |   |
| <b>Legislation</b>                                                                                       |   |   |   |   |   |
| To what extent is the Revenues Department immediately informed on changes in legislation?                |   |   |   |   |   |
| To what extent is legal assistance with regards to revenues available to the Revenues Department' staff? |   |   |   |   |   |
| <b>Cooperation</b>                                                                                       |   |   |   |   |   |

|                                                                                                                                       |  |  |  |  |  |
|---------------------------------------------------------------------------------------------------------------------------------------|--|--|--|--|--|
| To what extent is there cooperation between the Revenues Department and the Treasury Department?                                      |  |  |  |  |  |
| To what extent is there cooperation between the Revenues Department and other departments of the municipality?                        |  |  |  |  |  |
| To what extent is there cooperation between the Revenues Department and other public services such as the tax office, the CIPO, etc.? |  |  |  |  |  |
| To what extent is there cooperation between the Revenues Department and the Local Authority Management?                               |  |  |  |  |  |
| <b>Audit</b>                                                                                                                          |  |  |  |  |  |
| To what extent is the Court of Auditors' collection audit up to date?                                                                 |  |  |  |  |  |
| To what extent are the recommendations of the Court of Auditors' audit reports taken into account and implemented in practice?        |  |  |  |  |  |
| <b>Information Systems</b>                                                                                                            |  |  |  |  |  |
| To what extent are the capabilities of the information systems you use being exploited?                                               |  |  |  |  |  |
| To what extent do the information systems you use meet the needs of the Revenues Department?                                          |  |  |  |  |  |
| <b>Revenue Certification</b>                                                                                                          |  |  |  |  |  |
| Is the statement of property tax (PTA) revenue from non-electrified premises updated?                                                 |  |  |  |  |  |
| Is the statement of revenue from unpaid municipal taxes updated?                                                                      |  |  |  |  |  |
| Is the statement of revenue from fees on the gross receipts of traders updated?                                                       |  |  |  |  |  |
| Is the statement of revenue from traffic fines updated?                                                                               |  |  |  |  |  |
| Is the statement of revenue from cemeteries updated?                                                                                  |  |  |  |  |  |
| Is the statement of revenue from public utility charges updated?                                                                      |  |  |  |  |  |
| Is the statement of revenue from the rental of immovable property updated?                                                            |  |  |  |  |  |
