# Supplementary material
Source: MDPI journal article supplement (https://www.mdpi.com/2227-7099/12/4/78)
Supplement: s1 [file s1 › QUESTIONNAIRE B.pdf]

## QUESTIONNAIRE B

### 1. Local Government Organization type

|                                           |  |
|-------------------------------------------|--|
| Local Government Organisation Grade 1     |  |
| Local Government Organisation Grade 2     |  |
| Decentralised Administration Organisation |  |

### 2. Number of employees work in your LGO

|          |  |
|----------|--|
| 0-50     |  |
| 51-100   |  |
| 101-200  |  |
| Over 201 |  |

### 3. What is the highest level of operation hierarchy in your LGO?

|                    |  |
|--------------------|--|
| General Manager    |  |
| Unit Manager       |  |
| Area Manager       |  |
| Department Manager |  |

### 4. Has the Internal Auditor of your LGO been assigned?

|     |  |
|-----|--|
| Yes |  |
| No  |  |

### 5. Using the scale provided below, please rate the performance of your LGO based on the resources available.

1=Very Poor, 2=Poor, 3=Mediocre, 4=Good, 5=Very Good.

|                       | 1 | 2 | 3 | 4 | 5 |
|-----------------------|---|---|---|---|---|
| Economic Issues       |   |   |   |   |   |
| Administrative Issues |   |   |   |   |   |
| Technical Issues      |   |   |   |   |   |
| Legal Issues          |   |   |   |   |   |
| IT Issues             |   |   |   |   |   |

### 6. Has one or more of the following managerial tools being established in your LGO?

|                                | Yes | No |
|--------------------------------|-----|----|
| Internal manuals - Procedures  |     |    |
| Quality management standards   |     |    |
| Internal operation regulations |     |    |
| Work instructions              |     |    |
| Internal circulars             |     |    |
| Codes of conduct               |     |    |

7. Rate the extent to which you believe that the hierarchical levels of approval within your LGO are differentiated. Do you believe there is a clear distinction amongst them?

|            |          |        |          |       |
|------------|----------|--------|----------|-------|
|            |          |        |          |       |
| Not at all | A little | Medium | Adequate | A lot |

8. Rate the extent to which you believe that the responsibilities of your LGO officials are well-defined.

|            |          |        |          |       |
|------------|----------|--------|----------|-------|
|            |          |        |          |       |
| Not at all | A little | Medium | Adequate | A lot |

9. Has a system for recording and managing complaints being established in your LGO?

|     |  |
|-----|--|
| Yes |  |
| No  |  |

10. Do you believe that the existence of an Internal Audit Unit adds value to your LGO?

|     |  |
|-----|--|
| Yes |  |
| No  |  |

11. Have job descriptions being established and used in your LGO?

|     |  |
|-----|--|
| Yes |  |
| No  |  |

12. Is there an Internal Audit Unit in your LGO?

|     |  |
|-----|--|
| Yes |  |
| No  |  |

13. How well-staffed is the Internal Audit Unit of your LGO?

|            |          |        |          |       |
|------------|----------|--------|----------|-------|
|            |          |        |          |       |
| Not at all | A little | Medium | Adequate | A lot |

14. State the number of employees of the Internal Audit Unit of your LGO :.....

15. Is the Internal Audit Unit granted access to all relative info concerning the operation of your Unit?

|     |  |
|-----|--|
| Yes |  |
|-----|--|

|    |  |
|----|--|
| No |  |
|----|--|

16. How many Internal Audits were executed in your LGO last year?

|             |                |               |                           |
|-------------|----------------|---------------|---------------------------|
|             |                |               |                           |
| None<br>(0) | A few<br>(1-2) | Some<br>(3-4) | Adequate<br>(more than 5) |

17. Were there any external consultants used to conduct internal audits in your LGO?

|     |  |
|-----|--|
| Yes |  |
| No  |  |

18. Have internal procedures being approved in your LGO regarding the Internal Audit Unit operation?

|     |  |
|-----|--|
| Yes |  |
| No  |  |

19. If yes, please state at least one.

.....

20. Have internal procedures being approved in your LGO to detect its risks?

|     |  |
|-----|--|
| Yes |  |
| No  |  |

21. Have the potential risks of your LGO, as well as the processes for managing/monitoring them being set?

|     |  |
|-----|--|
| Yes |  |
| No  |  |

22. Has a specific risk management plan being determined in your LGO?

|     |  |
|-----|--|
| Yes |  |
| No  |  |

23. Do you believe that your LGO's Internal Auditors have adequate skills, knowledge, etc for this task?

|     |  |
|-----|--|
| Yes |  |
| No  |  |

24. If Not, do you believe they should get further training and obtain some accreditation?

|     |  |
|-----|--|
| Yes |  |
| No  |  |

25. Rate your satisfaction on the frequency of Internal Audit execution (by the Internal Audit Unit or by third parties) in your LGO.

1=Not at all, 2=A little, 3=Medium, 4=Adequate, 5=A lot

|                           | 1 | 2 | 3 | 4 | 5 |
|---------------------------|---|---|---|---|---|
| Planned General Audit     |   |   |   |   |   |
| Non-Planned General Audit |   |   |   |   |   |
| Irregular Audit           |   |   |   |   |   |

26. Have procedures being approved in your LGO regarding the safekeeping of internal audits' facts and results for future use?

|     |  |
|-----|--|
| Yes |  |
| No  |  |

27. Has the LGO appointed a person or a body to supervise the execution of the Internal Audit plan?

|     |  |
|-----|--|
| Yes |  |
| No  |  |

28. Has your LGO established a special procedure for each audited unit to be informed of and/or challenge the internal audit findings?

|     |  |
|-----|--|
| Yes |  |
| No  |  |

29. Has your LGO established a special procedure for each audited unit to propose corrective actions in response to the relative internal audit findings?

|     |  |
|-----|--|
| Yes |  |
| No  |  |

30. How many final Internal Audit Reports (not by third party Auditors) have been submitted to your LGO's management in the last 3 years?

|             |  |
|-------------|--|
| 0           |  |
| 1-4         |  |
| More than 4 |  |

31. Is there a yearly Review Report of the Internal Audits conducted in your LGO over the last 3 years?

|     |  |
|-----|--|
| Yes |  |
| No  |  |

32. Has your LGO established a process to follow-up the suggested corrective actions regarding the Internal Audit findings?

|     |  |
|-----|--|
| Yes |  |
| No  |  |
